# Supplementary material for: Characterization and Comparative Analysis of Two Rheum Complete Chloroplast Genomes
Source: Hindawi journal article supplement (doi:10.1155/2020/6490164), 2020-01-01
Supplement: f1 [file 6490164.f1.pdf]

# 1 Supporting information

2 **Table S1. List of annotated genes in *R. nobile* and *R. acuminatum***  
3 **chloroplast genomes**

| Groups of genes                     | Names of genes                                                                                                                                                                                                                                                                                                                                                                                                                                                                                                                                                                                                                                        |
|-------------------------------------|-------------------------------------------------------------------------------------------------------------------------------------------------------------------------------------------------------------------------------------------------------------------------------------------------------------------------------------------------------------------------------------------------------------------------------------------------------------------------------------------------------------------------------------------------------------------------------------------------------------------------------------------------------|
| Ribosomal RNAs                      | <i>rrn16</i> (×2), <i>rrn23</i> (×2), <i>rrn4.5</i> (×2), <i>rrn5</i> (×2)                                                                                                                                                                                                                                                                                                                                                                                                                                                                                                                                                                            |
|                                     | <i>trnA-UGC</i> *( × 2), <i>trnC-GCA</i> , <i>trnD-GUC</i> , <i>trnE-UUC</i> , <i>trnF-GAA</i> , <i>trnG-M-CAU</i> , <i>trnG-UCC</i> *( × 2),<br><i>trnH-GUG</i> , <i>trnI-CAU</i> *( × 2), <i>trnI-GAU</i> *( × 2), <i>trnK-UUU</i> *, <i>trnL-CAA</i> ( × 2), <i>trnL-UAA</i> *, <i>trnL-UAG</i> ,<br>Transfer RNAs<br><i>trnM-CAU</i> ( × 2), <i>trnN-GUU</i> ( × 2), <i>trnP-GGG</i> , <i>trnP-UGG</i> , <i>trnQ-UUG</i> , <i>trnR-ACG</i> ( × 2), <i>trnR-UCU</i> ,<br><i>trnS-GCU</i> , <i>trnS-GGA</i> , <i>trnS-UGA</i> , <i>trnT-GGU</i> , <i>trnT-UGU</i> , <i>trnV-GAC</i> ( × 2), <i>trnV-UAC</i> *, <i>trnW-CCA</i> ,<br><i>trnY-GUA</i> |
| Proteins of small ribosomal subunit | <i>rps16</i> *, <i>rps2</i> , <i>rps14</i> , <i>rps4</i> , <i>rps18</i> , <i>rps12</i> (×2), <i>rps11</i> , <i>rps8</i> , <i>rps3</i> , <i>rps19</i> , <i>rps7</i> (×2), <i>rps15</i>                                                                                                                                                                                                                                                                                                                                                                                                                                                                 |
| Proteins of large ribosomal subunit | <i>rpl33</i> , <i>rpl20</i> , <i>rpl36</i> , <i>rpl14</i> , <i>rpl16</i> *, <i>rpl22</i> , <i>rpl2</i> *(×2), <i>rpl23</i> (×2), <i>rpl32</i>                                                                                                                                                                                                                                                                                                                                                                                                                                                                                                         |
| Subunits of RNA polymerase          | <i>rpoC2</i> , <i>rpoC1</i> *, <i>rpoB</i> , <i>rpoA</i>                                                                                                                                                                                                                                                                                                                                                                                                                                                                                                                                                                                              |
| Photosystem I                       | <i>psaB</i> , <i>psaA</i> , <i>psaI</i> , <i>psaJ</i> , <i>psaC</i>                                                                                                                                                                                                                                                                                                                                                                                                                                                                                                                                                                                   |
| Photosystem II                      | <i>psbA</i> , <i>psbB</i> , <i>psbC</i> , <i>psbD</i> , <i>psbE</i> , <i>psbF</i> , <i>psbH</i> , <i>psbI</i> , <i>psbJ</i> , <i>psbK</i> , <i>psbL</i> , <i>psbM</i> , <i>psbN</i> , <i>psbT</i> , <i>psbZ</i>                                                                                                                                                                                                                                                                                                                                                                                                                                       |
| Cytochrome b/f complex              | <i>petA</i> , <i>petB</i> *, <i>petD</i> *, <i>petG</i> , <i>petL</i> , <i>petN</i>                                                                                                                                                                                                                                                                                                                                                                                                                                                                                                                                                                   |
| Subunits of ATP synthase            | <i>atpA</i> , <i>atpB</i> , <i>atpE</i> , <i>atpF</i> *, <i>atpH</i> , <i>atpI</i>                                                                                                                                                                                                                                                                                                                                                                                                                                                                                                                                                                    |
| Protease                            | <i>clpP</i> **                                                                                                                                                                                                                                                                                                                                                                                                                                                                                                                                                                                                                                        |
| Large subunit of rubisco            | <i>rbcL</i>                                                                                                                                                                                                                                                                                                                                                                                                                                                                                                                                                                                                                                           |
| NADH dehydrogenase                  | <i>ndhA</i> *, <i>ndhB</i> *(×2), <i>ndhC</i> , <i>ndhD</i> , <i>ndhE</i> , <i>ndhF</i> , <i>ndhG</i> , <i>ndhH</i> , <i>ndhI</i> , <i>ndhJ</i> , <i>ndhK</i>                                                                                                                                                                                                                                                                                                                                                                                                                                                                                         |
| Maturase                            | <i>matK</i>                                                                                                                                                                                                                                                                                                                                                                                                                                                                                                                                                                                                                                           |
| Envelop membrane protein            | <i>cemA</i>                                                                                                                                                                                                                                                                                                                                                                                                                                                                                                                                                                                                                                           |
| Acetyl-CoA carboxylase              | <i>accD</i>                                                                                                                                                                                                                                                                                                                                                                                                                                                                                                                                                                                                                                           |
| Synthesis gene                      | <i>ccsA</i>                                                                                                                                                                                                                                                                                                                                                                                                                                                                                                                                                                                                                                           |
| Open reading frames (ORF, ycf)      | <i>ycf1</i> (×2), <i>ycf2</i> (×2), <i>ycf3</i> **, <i>ycf4</i>                                                                                                                                                                                                                                                                                                                                                                                                                                                                                                                                                                                       |

4 \* indicates a gene with one intron, and \*\* indicates a gene with two introns. (×2) indicates that the number of  
5 repeat units is 2. The rps12 gene is a trans-spliced gene.

6

7 **Table S2. List of species used for interspecific comparisons.**

| Species                       | GenBank  |
|-------------------------------|----------|
|                               | Number   |
| 1 <i>Fagopyrum esculentum</i> | EU254477 |

|    |                                |          |
|----|--------------------------------|----------|
| 2  | <i>Fagopyrum luojishanense</i> | KY275182 |
| 3  | <i>Fagopyrum tataricum</i>     | KM201427 |
| 4  | <i>Fallopia multiflora</i>     | MK330002 |
| 5  | <i>Rheum wittrockii</i>        | KY985269 |
| 6  | <i>Rheum palmatum</i>          | NC027728 |
| 7  | <i>Oxyria sinensis</i>         | KX774248 |
| 8  | <i>Rheum acuminatum</i>        | MN514858 |
| 9  | <i>Rheum nobile</i>            | MK988314 |
| 10 | <i>Rumex acetosa</i>           | MH359405 |

8

9 **Table S3 . List of species used for phylogenetic tree construction**

|    | Species                                 | GenBank Number | Family          |
|----|-----------------------------------------|----------------|-----------------|
| 1  | <i>Silene conica</i>                    | JF715054       | Caryophyllaceae |
| 2  | <i>Silene vulgaris</i>                  | JF715057       |                 |
| 3  | <i>Pseudostellaria longipedicellata</i> | MH373593       |                 |
| 4  | <i>Pseudostellaria okamotoi</i>         | MH879018       |                 |
| 5  | <i>Mollugo verticillata</i>             | MK397876       | Molluginaceae   |
| 6  | <i>Trigastrotheca stricta</i>           | MK397905       |                 |
| 7  | <i>Nyctaginia capitata</i>              | MH286318       | Nyctaginaceae   |
| 8  | <i>Acleisanthes obtusa</i>              | MH286321       |                 |
| 9  | <i>Bougainvillea spectabilis</i>        | MK397858       |                 |
| 10 | <i>Mirabilis jalapa</i>                 | MK397875       |                 |

|    |                                    |          |                |
|----|------------------------------------|----------|----------------|
| 11 | <i>Amaranthus hypochondriacus</i>  | KX279888 |                |
| 12 | <i>Amaranthus caudatus</i>         | MG836508 |                |
| 13 | <i>Celosia argentea</i>            | MK397861 | Amaranthaceae  |
| 14 | <i>Alternanthera philoxeroides</i> | MK795965 |                |
| 15 | <i>Drosera regia</i>               | KY679199 | Droseraceae    |
| 16 | <i>Anredera cordifolia</i>         | MK397854 |                |
| 17 | <i>Basella alba</i>                | MK397856 | Basellaceae    |
| 18 | <i>Fagopyrum esculentum</i>        | EU254477 |                |
| 19 | <i>Fagopyrum luojishanense</i>     | KY275182 |                |
| 20 | <i>Fagopyrum tataricum</i>         | KM201427 |                |
| 21 | <i>Fallopia multiflora</i>         | MK330002 |                |
| 22 | <i>Rheum wittrockii</i>            | KY985269 | Polygonaceae   |
| 23 | <i>Rheum palmatum</i>              | NC027728 |                |
| 24 | <i>Oxyria sinensis</i>             | KX774248 |                |
| 25 | <i>Rheum acuminatum</i>            | MN514858 |                |
| 26 | <i>Rheum nobile</i>                | MK988314 |                |
| 27 | <i>Haloxylon ammodendron</i>       | KF534478 |                |
| 28 | <i>Haloxylon persicum</i>          | KF534479 |                |
| 29 | <i>Chenopodium album</i>           | KY419707 |                |
| 30 | <i>Dysphania botrys</i>            | MH898873 | Chenopodiaceae |
| 31 | <i>Dysphania pumilio</i>           | MH936550 |                |
| 32 | <i>Chenopodium ficifolium</i>      | MK182725 |                |

33 *Dysphania ambrosioides*

MK182726

34 *Rosa rugosa*

MK986659

Outgroup

**Table S4 . List of 53 protein-coding genes used for phylogenetic tree**

**construction.**

| Genes |      | Genes |       | Genes |       |
|-------|------|-------|-------|-------|-------|
| 1     | atpA | 19    | psbA  | 37    | rpl32 |
| 2     | atpB | 20    | psbB  | 38    | rpl33 |
| 3     | atpE | 21    | psbC  | 39    | rpoA  |
| 4     | atpF | 22    | psbD  | 40    | rpoB  |
| 5     | atpH | 23    | psbE  | 41    | rpoC1 |
| 6     | atpI | 24    | psbF  | 42    | rpoC2 |
| 7     | ccsA | 25    | psbH  | 43    | rps11 |
| 8     | cemA | 26    | psbI  | 44    | rps12 |
| 9     | clpP | 27    | psbJ  | 45    | rps14 |
| 10    | petA | 28    | psbK  | 46    | rps16 |
| 11    | petG | 29    | psbM  | 47    | rps18 |
| 12    | petL | 30    | psbN  | 48    | rps2  |
| 13    | petN | 31    | psbT  | 49    | rps3  |
| 14    | psaA | 32    | rbcL  | 50    | rps4  |
| 15    | psaB | 33    | rpl14 | 51    | rps7  |
| 16    | psaC | 34    | rpl16 | 52    | rps8  |
| 17    | psaI | 35    | rpl20 | 53    | rpl32 |
| 18    | psaJ | 36    | rpl2  |       |       |

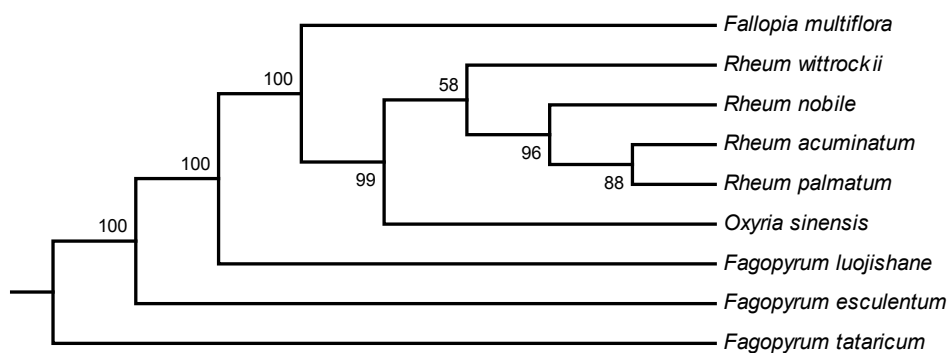

15 S1 Figure **Phylogenetic tree reconstruction of the 9 species inferred from maximum**  
16 **likelihood (ML), based on the *psaC-ndhE* and *psaA-ycf3* genes.**

17
